# Supplementary material
Source: PubMed Central journal article supplement (PMC5743444)
Supplement: EHP565.s001.acco.pdf [file EHP565.s001.acco.pdf]

**Note to readers with disabilities:** *EHP* strives to ensure that all journal content is accessible to all readers. However, some figures and Supplemental Material published in *EHP* articles may not conform to [508 standards](#) due to the complexity of the information being presented. If you need assistance accessing journal content, please contact [ehponline@niehs.nih.gov](mailto:ehponline@niehs.nih.gov). Our staff will work with you to assess and meet your accessibility needs within 3 working days.

## **Supplemental Material**

# **Environmental Exposures to Lead, Mercury, and Cadmium and Hearing Loss in Adults and Adolescents: KNHANES 2010-2012**

Yoon-Hyeong Choi and Sung Kyun Park

### **Table of Contents**

#### Study Population

**Table S1.** ORs (95% CIs) of hearing loss (>25dB) by blood lead, mercury, and cadmium levels in adults ( $n=5,187$ )

**Table S2.** Change (95% CIs) in hearing thresholds (dB) by blood lead, mercury, and cadmium levels in adults ( $n=5,187$ )

**Table S3.** ORs (95% CIs) of hearing loss (>15dB) by blood lead, mercury, and cadmium levels in adolescents ( $n=853$ )

**Table S4.** Change (95% CIs) in hearing thresholds (dB) by blood lead, mercury, and cadmium levels in adolescents ( $n=853$ )

**Table S5.** ORs (95% CIs) of hearing loss (>25dB) by blood lead, mercury, and cadmium levels stratified by adult age groups at single-pollutant models in adults ( $n=5,187$ )

**Table S6.** Urinary cotinine-adjusted ORs (95% CIs) of hearing loss (>25dB) by blood cadmium levels at single-pollutant models in adults ( $n=3,292$ )

**Table S7.** Fish intake-adjusted ORs (95% CIs) of hearing loss (>25dB) by blood mercury levels at single-pollutant models in adults ( $n=2,973$ )

**Table S8.** Cholesterol-adjusted ORs (95% CIs) of hearing loss (>25dB) by levels of blood lead, mercury, and cadmium at single-pollutant models in adults (n=5,187)

**Table S9.** Education-unadjusted ORs (95% CIs) of hearing loss (>25dB) by levels of blood lead, mercury, and cadmium at single-pollutant models in adults (n=5,187)

## **Study population**

An additional 354 participants (328 adults and 26 adolescents) had missing data on covariates and were not included in the analysis: missing data on occupational noise (27 adults), recreational noise (44 adults and 13 adolescents), firearm noise (35 adults and 12 adolescents), socio-behavioral factors of education, income, BMI, and cigarette smoke (142 adults and 12 adolescents), clinical factors of diabetes and hypertension (189 adults). Finally, 6,040 participants (5,187 adults and 853 adolescents) were included for the analysis.

**Table S1.** ORs (95% CIs) of hearing loss<sup>a</sup> (>25dB) by blood lead, mercury, and cadmium levels in adults (n=5,187)

| Variables                               | No. hearing loss/<br>No. participants | Single-pollutant model |              | Multi-pollutant model |              |
|-----------------------------------------|---------------------------------------|------------------------|--------------|-----------------------|--------------|
| <b>Speech-frequency PTA<sup>b</sup></b> |                                       |                        |              |                       |              |
| <b>Lead</b>                             |                                       |                        |              |                       |              |
| Per doubling of lead                    | 1124/5187                             | 1.15                   | (0.94, 1.41) | 1.12                  | (0.91, 1.37) |
| Lead Quartile ( $\mu\text{g/dL}$ )      |                                       |                        |              |                       |              |
| Q 1 (0.327-1.593)                       | 170/1296                              | 1 (Reference)          |              | 1 (Reference)         |              |
| Q 2 (1.594-2.146)                       | 204/1296                              | 0.94                   | (0.65, 1.35) | 0.92                  | (0.64, 1.33) |
| Q 3 (2.148-2.822)                       | 330/1298                              | 1.29                   | (0.92, 1.78) | 1.26                  | (0.91, 1.75) |
| Q 4 (2.823-26.507)                      | 420/1297                              | 1.25                   | (0.87, 1.79) | 1.21                  | (0.85, 1.74) |
| P-Trend                                 |                                       | 0.066                  |              | 0.092                 |              |
| <b>Mercury</b>                          |                                       |                        |              |                       |              |
| Per doubling of mercury                 | 1124/5187                             | 0.96                   | (0.84, 1.08) | 0.93                  | (0.81, 1.05) |
| Mercury Quartile ( $\mu\text{g/L}$ )    |                                       |                        |              |                       |              |
| Q 1 (0.363-2.378)                       | 284/1296                              | 1 (Reference)          |              | 1 (Reference)         |              |
| Q 2 (2.379-3.528)                       | 250/1297                              | 0.84                   | (0.61, 1.17) | 0.82                  | (0.59, 1.14) |
| Q 3 (3.529-5.369)                       | 267/1296                              | 0.79                   | (0.58, 1.09) | 0.75                  | (0.54, 1.05) |
| Q 4 (5.370-60.678)                      | 323/1298                              | 0.84                   | (0.63, 1.12) | 0.78                  | (0.58, 1.05) |
| P-Trend                                 |                                       | 0.221                  |              | 0.100                 |              |
| <b>Cadmium</b>                          |                                       |                        |              |                       |              |
| Per doubling of cadmium                 | 1124/5187                             | 1.18                   | (1.00, 1.39) | 1.18                  | (0.99, 1.40) |
| Cadmium Quartile ( $\mu\text{g/L}$ )    |                                       |                        |              |                       |              |
| Q 1 (0.068-0.689)                       | 140/1293                              | 1 (Reference)          |              | 1 (Reference)         |              |
| Q 2 (0.690-1.033)                       | 255/1300                              | 1.04                   | (0.73, 1.49) | 1.04                  | (0.73, 1.50) |
| Q 3 (1.035-1.470)                       | 340/1299                              | 1.22                   | (0.86, 1.72) | 1.22                  | (0.87, 1.73) |
| Q 4 (1.471-6.422)                       | 389/1295                              | 1.30                   | (0.88, 1.91) | 1.29                  | (0.87, 1.90) |
| P-Trend                                 |                                       | 0.117                  |              | 0.141                 |              |
| <b>High-frequency PTA<sup>c</sup></b>   |                                       |                        |              |                       |              |
| <b>Lead</b>                             |                                       |                        |              |                       |              |
| Per doubling of lead                    | 1124/5187                             | 1.30                   | (1.08, 1.57) | 1.25                  | (1.04, 1.50) |
| Lead Quartile ( $\mu\text{g/dL}$ )      |                                       |                        |              |                       |              |
| Q 1 (0.327-1.593)                       | 276/1296                              | 1 (Reference)          |              | 1 (Reference)         |              |
| Q 2 (1.594-2.146)                       | 420/1296                              | 1.13                   | (0.83, 1.53) | 1.11                  | (0.82, 1.51) |
| Q 3 (2.148-2.822)                       | 587/1298                              | 1.35                   | (1.00, 1.81) | 1.32                  | (0.99, 1.78) |
| Q 4 (2.823-26.507)                      | 810/1297                              | 1.70                   | (1.25, 2.31) | 1.64                  | (1.21, 2.24) |
| P-Trend                                 |                                       | <0.001                 |              | <0.001                |              |
| <b>Mercury</b>                          |                                       |                        |              |                       |              |
| Per doubling of mercury                 | 1124/5187                             | 0.98                   | (0.87, 1.09) | 0.94                  | (0.84, 1.05) |
| Mercury Quartile ( $\mu\text{g/L}$ )    |                                       |                        |              |                       |              |
| Q 1 (0.363-2.378)                       | 469/1296                              | 1 (Reference)          |              | 1 (Reference)         |              |
| Q 2 (2.379-3.528)                       | 460/1297                              | 0.89                   | (0.68, 1.16) | 0.85                  | (0.65, 1.12) |
| Q 3 (3.529-5.369)                       | 524/1296                              | 0.83                   | (0.63, 1.08) | 0.77                  | (0.59, 1.02) |
| Q 4 (5.370-60.678)                      | 640/1298                              | 0.89                   | (0.68, 1.17) | 0.80                  | (0.61, 1.06) |
| P-Trend                                 |                                       | 0.382                  |              | 0.091                 |              |
| <b>Cadmium</b>                          |                                       |                        |              |                       |              |
| Per doubling of cadmium                 | 1124/5187                             | 1.25                   | (1.08, 1.44) | 1.21                  | (1.04, 1.40) |
| Cadmium Quartile ( $\mu\text{g/L}$ )    |                                       |                        |              |                       |              |
| Q 1 (0.068-0.689)                       | 289/1293                              | 1 (Reference)          |              | 1 (Reference)         |              |
| Q 2 (0.690-1.033)                       | 489/1300                              | 1.10                   | (0.81, 1.49) | 1.07                  | (0.78, 1.45) |
| Q 3 (1.035-1.470)                       | 645/1299                              | 1.43                   | (1.06, 1.93) | 1.36                  | (1.01, 1.83) |
| Q 4 (1.471-6.422)                       | 670/1295                              | 1.47                   | (1.05, 2.05) | 1.34                  | (0.96, 1.88) |
| P-Trend                                 |                                       | 0.007                  |              | 0.031                 |              |

Models were adjusted for age, age<sup>2</sup>, sex, education, BMI, cigarette smoke, current diagnosis of hypertension, current diagnosis of diabetes, occupational noise, recreational noise, and firearm noise. For the multi-pollutant models, effect estimates for each metal were computed while the other two metal variables were included as covariates.

<sup>a</sup>Hearing loss was defined as pure tone average >25dB.

<sup>b</sup>Speech-frequency PTA at 0.5, 1, 2, and 4 kHz.

<sup>c</sup>High-frequency PTA at 3, 4, and 6 kHz.

**Table S2.** Change (95% CIs) in hearing thresholds (dB) by blood lead, mercury, and cadmium levels in adults (n=5,187)

| Variables                               | No.  | Single-pollutant model |               | Multi-pollutant model |               |
|-----------------------------------------|------|------------------------|---------------|-----------------------|---------------|
| <b>Speech-frequency PTA<sup>a</sup></b> |      |                        |               |                       |               |
| <b>Lead</b>                             |      |                        |               |                       |               |
| Per doubling of lead                    |      | 1.08                   | (0.26, 1.89)  | 1.02                  | (0.17, 1.88)  |
| Lead Quartile ( $\mu\text{g/dL}$ )      |      |                        |               |                       |               |
| Q 1 (0.327-1.593)                       | 1296 | 0                      | (Reference)   | 0                     | (Reference)   |
| Q 2 (1.594-2.146)                       | 1296 | 0.12                   | (-0.85, 1.09) | 0.12                  | (-0.87, 1.11) |
| Q 3 (2.148-2.822)                       | 1298 | 1.18                   | (0.01, 2.34)  | 1.17                  | (-0.02, 2.36) |
| Q 4 (2.823-26.507)                      | 1297 | 1.96                   | (0.68, 3.25)  | 1.94                  | (0.60, 3.29)  |
| P-Trend                                 |      |                        | 0.001         |                       | 0.002         |
| <b>Mercury</b>                          |      |                        |               |                       |               |
| Per doubling of mercury                 |      | -0.26                  | (-0.81, 0.30) | -0.41                 | (-0.98, 0.15) |
| Mercury Quartile ( $\mu\text{g/L}$ )    |      |                        |               |                       |               |
| Q 1 (0.363-2.378)                       | 1296 | 0                      | (Reference)   | 0                     | (Reference)   |
| Q 2 (2.379-3.528)                       | 1297 | -0.20                  | (-1.37, 0.96) | -0.31                 | (-1.47, 0.84) |
| Q 3 (3.529-5.369)                       | 1296 | -0.76                  | (-1.88, 0.36) | -0.97                 | (-2.10, 0.16) |
| Q 4 (5.370-60.678)                      | 1298 | -0.45                  | (-1.70, 0.79) | -0.81                 | (-2.08, 0.47) |
| P-Trend                                 |      |                        | 0.330         |                       | 0.124         |
| <b>Cadmium</b>                          |      |                        |               |                       |               |
| Per doubling of cadmium                 |      | 0.61                   | (-0.01, 1.22) | 0.50                  | (-0.14, 1.13) |
| Cadmium Quartile ( $\mu\text{g/L}$ )    |      |                        |               |                       |               |
| Q 1 (0.068-0.689)                       | 1293 | 0                      | (Reference)   | 0                     | (Reference)   |
| Q 2 (0.690-1.033)                       | 1300 | -0.24                  | (-1.28, 0.79) | -0.30                 | (-1.32, 0.73) |
| Q 3 (1.035-1.470)                       | 1299 | 0.47                   | (-0.67, 1.61) | 0.33                  | (-0.83, 1.49) |
| Q 4 (1.471-6.422)                       | 1295 | 0.90                   | (-0.48, 2.29) | 0.62                  | (-0.78, 2.03) |
| P-Trend                                 |      |                        | 0.115         |                       | 0.275         |
| <b>High-frequency PTA<sup>b</sup></b>   |      |                        |               |                       |               |
| <b>Lead</b>                             |      |                        |               |                       |               |
| Per doubling of lead                    |      | 1.83                   | (0.76, 2.89)  | 1.87                  | (0.74, 3.00)  |
| Lead Quartile ( $\mu\text{g/dL}$ )      |      |                        |               |                       |               |
| Q 1 (0.327-1.593)                       | 1296 | 0                      | (Reference)   | 0                     | (Reference)   |
| Q 2 (1.594-2.146)                       | 1296 | 0.10                   | (-1.22, 1.42) | 0.20                  | (-1.14, 1.54) |
| Q 3 (2.148-2.822)                       | 1298 | 1.68                   | (0.21, 3.15)  | 1.81                  | (0.30, 3.32)  |
| Q 4 (2.823-26.507)                      | 1297 | 3.50                   | (1.71, 5.30)  | 3.69                  | (1.83, 5.56)  |
| P-Trend                                 |      |                        | <0.001        |                       | <0.001        |
| <b>Mercury</b>                          |      |                        |               |                       |               |
| Per doubling of mercury                 |      | -0.28                  | (-1.05, 0.49) | -0.48                 | (-1.26, 0.30) |
| Mercury Quartile ( $\mu\text{g/L}$ )    |      |                        |               |                       |               |
| Q 1 (0.363-2.378)                       | 1296 | 0                      | (Reference)   | 0                     | (Reference)   |
| Q 2 (2.379-3.528)                       | 1297 | -0.32                  | (-1.80, 1.17) | -0.46                 | (-1.93, 1.02) |
| Q 3 (3.529-5.369)                       | 1296 | -1.10                  | (-2.56, 0.37) | -1.37                 | (-2.84, 0.09) |
| Q 4 (5.370-60.678)                      | 1298 | -0.89                  | (-2.60, 0.82) | -1.41                 | (-3.16, 0.34) |
| P-Trend                                 |      |                        | 0.200         |                       | 0.058         |
| <b>Cadmium</b>                          |      |                        |               |                       |               |
| Per doubling of cadmium                 |      | 0.48                   | (-0.33, 1.29) | 0.22                  | (-0.62, 1.06) |
| Cadmium Quartile ( $\mu\text{g/L}$ )    |      |                        |               |                       |               |
| Q 1 (0.068-0.689)                       | 1293 | 0                      | (Reference)   | 0                     | (Reference)   |
| Q 2 (0.690-1.033)                       | 1300 | -0.69                  | (-2.20, 0.82) | -0.81                 | (-2.31, 0.69) |
| Q 3 (1.035-1.470)                       | 1299 | 0.36                   | (-1.35, 2.08) | 0.11                  | (-1.66, 1.87) |
| Q 4 (1.471-6.422)                       | 1295 | 0.58                   | (-1.31, 2.48) | 0.04                  | (-1.88, 1.95) |
| P-Trend                                 |      |                        | 0.319         |                       | 0.742         |

Models were adjusted for age, age<sup>2</sup>, sex, education, BMI, cigarette smoke, current diagnosis of hypertension, current diagnosis of diabetes, occupational noise, recreational noise, and firearm noise. For the multi-pollutant models, effect estimates for each metal were computed while the other two metal variables were included as covariates.

PTA, Pure tone average.

<sup>a</sup>Speech-frequency PTA at 0.5, 1, 2, and 4 kHz.

<sup>b</sup>High-frequency PTA at 3, 4, and 6 kHz.

**Table S3.** ORs (95% CIs) of hearing loss <sup>a</sup> (>15dB) by blood lead, mercury, and cadmium levels in adolescents (n=853)

| Variables                               | No. hearing loss/<br>No. participants | Single-pollutant model |              | Multi-pollutant model |              |
|-----------------------------------------|---------------------------------------|------------------------|--------------|-----------------------|--------------|
| <b>Speech-frequency PTA<sup>b</sup></b> |                                       |                        |              |                       |              |
| <b>Lead</b>                             |                                       |                        |              |                       |              |
| Per doubling of lead                    | 48/853                                | 1.20                   | (0.48, 3.05) | 1.09                  | (0.40, 2.97) |
| Lead Quartile ( $\mu\text{g/dL}$ )      |                                       |                        |              |                       |              |
| Q 1 (0.260-0.975)                       | 11/213                                | 1 (Reference)          |              | 1 (Reference)         |              |
| Q 2 (0.978-1.260)                       | 12/213                                | 1.17                   | (0.41, 3.32) | 1.12                  | (0.39, 3.18) |
| Q 3 (1.261-1.557)                       | 13/213                                | 1.08                   | (0.38, 3.08) | 0.82                  | (0.28, 2.40) |
| Q 4 (1.562-5.904)                       | 12/214                                | 1.24                   | (0.34, 4.49) | 0.91                  | (0.24, 3.44) |
| <i>P</i> -Trend                         |                                       | 0.803                  |              | 0.949                 |              |
| <b>Mercury</b>                          |                                       |                        |              |                       |              |
| Per doubling of mercury                 | 48/853                                | 1.01                   | (0.53, 1.91) | 0.97                  | (0.51, 1.83) |
| Mercury Quartile ( $\mu\text{g/L}$ )    |                                       |                        |              |                       |              |
| Q 1 (0.555-1.488)                       | 13/213                                | 1 (Reference)          |              | 1 (Reference)         |              |
| Q 2 (1.490-1.956)                       | 10/213                                | 1.00                   | (0.36, 2.75) | 1.00                  | (0.36, 2.79) |
| Q 3 (1.960-2.683)                       | 11/214                                | 0.60                   | (0.21, 1.75) | 0.56                  | (0.19, 1.71) |
| Q 4 (2.687-8.409)                       | 14/213                                | 1.20                   | (0.41, 3.54) | 1.15                  | (0.39, 3.38) |
| <i>P</i> -Trend                         |                                       | 0.901                  |              | 0.968                 |              |
| <b>Cadmium</b>                          |                                       |                        |              |                       |              |
| Per doubling of cadmium                 | 48/853                                | 1.41                   | (0.93, 2.14) | 1.40                  | (0.88, 2.20) |
| Cadmium Quartile ( $\mu\text{g/L}$ )    |                                       |                        |              |                       |              |
| Q 1 (0.010-0.245)                       | 12/214                                | 1 (Reference)          |              | 1 (Reference)         |              |
| Q 2 (0.246-0.341)                       | 9/213                                 | 0.96                   | (0.33, 2.76) | 0.96                  | (0.33, 2.83) |
| Q 3 (0.342-0.495)                       | 9/213                                 | 0.93                   | (0.33, 2.66) | 0.91                  | (0.30, 2.74) |
| Q 4 (0.496-2.067)                       | 18/213                                | 2.39                   | (0.98, 5.83) | 2.53                  | (1.02, 6.28) |
| <i>P</i> -Trend                         |                                       | 0.083                  |              | 0.088                 |              |
| <b>High-frequency PTA<sup>c</sup></b>   |                                       |                        |              |                       |              |
| <b>Lead</b>                             |                                       |                        |              |                       |              |
| Per doubling of lead                    | 95/853                                | 1.26                   | (0.73, 2.16) | 1.17                  | (0.68, 2.01) |
| Lead Quartile ( $\mu\text{g/dL}$ )      |                                       |                        |              |                       |              |
| Q 1 (0.260-0.975)                       | 20/213                                | 1 (Reference)          |              | 1 (Reference)         |              |
| Q 2 (0.978-1.260)                       | 20/213                                | 0.89                   | (0.39, 2.03) | 0.88                  | (0.37, 2.07) |
| Q 3 (1.261-1.557)                       | 31/213                                | 1.88                   | (0.83, 4.25) | 1.65                  | (0.67, 4.05) |
| Q 4 (1.562-5.904)                       | 24/214                                | 1.38                   | (0.63, 3.02) | 1.17                  | (0.49, 2.81) |
| <i>P</i> -Trend                         |                                       | 0.181                  |              | 0.377                 |              |
| <b>Mercury</b>                          |                                       |                        |              |                       |              |
| Per doubling of mercury                 | 95/853                                | 0.73                   | (0.45, 1.20) | 0.70                  | (0.43, 1.15) |
| Mercury Quartile ( $\mu\text{g/L}$ )    |                                       |                        |              |                       |              |
| Q 1 (0.555-1.488)                       | 32/213                                | 1 (Reference)          |              | 1 (Reference)         |              |
| Q 2 (1.490-1.956)                       | 20/213                                | 0.64                   | (0.30, 1.36) | 0.55                  | (0.26, 1.18) |
| Q 3 (1.960-2.683)                       | 17/214                                | 0.34                   | (0.16, 0.74) | 0.30                  | (0.13, 0.66) |
| Q 4 (2.687-8.409)                       | 26/213                                | 0.58                   | (0.27, 1.26) | 0.52                  | (0.25, 1.09) |
| <i>P</i> -Trend                         |                                       | 0.107                  |              | 0.072                 |              |
| <b>Cadmium</b>                          |                                       |                        |              |                       |              |
| Per doubling of cadmium                 | 95/853                                | 1.54                   | (1.12, 2.11) | 1.55                  | (1.11, 2.16) |
| Cadmium Quartile ( $\mu\text{g/L}$ )    |                                       |                        |              |                       |              |
| Q 1 (0.010-0.245)                       | 20/214                                | 1 (Reference)          |              | 1 (Reference)         |              |
| Q 2 (0.246-0.341)                       | 17/213                                | 1.06                   | (0.46, 2.46) | 0.99                  | (0.43, 2.27) |
| Q 3 (0.342-0.495)                       | 20/213                                | 1.51                   | (0.68, 3.37) | 1.50                  | (0.68, 3.33) |
| Q 4 (0.496-2.067)                       | 38/213                                | 3.03                   | (1.44, 6.40) | 2.98                  | (1.37, 6.49) |
| <i>P</i> -Trend                         |                                       | 0.003                  |              | 0.004                 |              |

Models were adjusted for age, age<sup>2</sup>, sex, education, BMI, cigarette smoke, recreational noise, and firearm noise. For the multi-pollutant models, effect estimates for each metal were computed while the other two metal variables were included as covariates.

<sup>a</sup> Hearing loss was defined as pure tone average >15dB.

<sup>b</sup> Speech-frequency at 0.5, 1, 2, and 4 kHz.

<sup>c</sup> High-frequency PTA at 3, 4, and 6 kHz.

**Table S4.** Change (95% CIs) in hearing thresholds (dB) by blood lead, mercury, and cadmium levels in adolescents (n=853)

| Variables                               | No. | Single-pollutant model |               | Multi-pollutant model |               |
|-----------------------------------------|-----|------------------------|---------------|-----------------------|---------------|
| <b>Speech-frequency PTA<sup>a</sup></b> |     |                        |               |                       |               |
| <b>Lead</b>                             |     |                        |               |                       |               |
| Per doubling of lead                    |     | 0.54                   | (-0.27, 1.35) | 0.52                  | (-0.36, 1.40) |
| Lead Quartile ( $\mu\text{g/dL}$ )      |     |                        |               |                       |               |
| Q 1 (0.260-0.975)                       | 213 | 0 (Reference)          |               | (Reference)           |               |
| Q 2 (0.978-1.260)                       | 213 | 1.08                   | (-0.33, 2.48) | 1.02                  | (-0.36, 2.40) |
| Q 3 (1.261-1.557)                       | 213 | 0.97                   | (-0.16, 2.11) | 0.81                  | (-0.33, 1.94) |
| Q 4 (1.562-5.904)                       | 214 | 1.02                   | (-0.27, 2.31) | 0.78                  | (-0.57, 2.14) |
| <i>P</i> -Trend                         |     | 0.148                  |               | 0.258                 |               |
| <b>Mercury</b>                          |     |                        |               |                       |               |
| Per doubling of mercury                 |     | 0.14                   | (-0.60, 0.88) | 0.10                  | (-0.64, 0.85) |
| Mercury Quartile ( $\mu\text{g/L}$ )    |     |                        |               |                       |               |
| Q 1 (0.555-1.488)                       | 213 | 0 (Reference)          |               | (Reference)           |               |
| Q 2 (1.490-1.956)                       | 213 | -0.06                  | (-1.42, 1.30) | -0.10                 | (-1.47, 1.27) |
| Q 3 (1.960-2.683)                       | 214 | -0.59                  | (-1.75, 0.57) | -0.62                 | (-1.77, 0.53) |
| Q 4 (2.687-8.409)                       | 213 | 0.86                   | (-0.57, 2.29) | 0.80                  | (-0.64, 2.25) |
| <i>P</i> -Trend                         |     | 0.351                  |               | 0.407                 |               |
| <b>Cadmium</b>                          |     |                        |               |                       |               |
| Per doubling of cadmium                 |     | 0.11                   | (-0.60, 0.82) | 0.03                  | (-0.72, 0.79) |
| Cadmium Quartile ( $\mu\text{g/L}$ )    |     |                        |               |                       |               |
| Q 1 (0.010-0.245)                       | 214 | 0 (Reference)          |               | (Reference)           |               |
| Q 2 (0.246-0.341)                       | 213 | 0.25                   | (-1.31, 1.82) | 0.29                  | (-1.20, 1.79) |
| Q 3 (0.342-0.495)                       | 213 | 0.14                   | (-1.35, 1.63) | 0.08                  | (-1.38, 1.54) |
| Q 4 (0.496-2.067)                       | 213 | 0.68                   | (-0.81, 2.18) | 0.65                  | (-0.82, 2.13) |
| <i>P</i> -Trend                         |     | 0.418                  |               | 0.568                 |               |
| <b>High-frequency PTA<sup>b</sup></b>   |     |                        |               |                       |               |
| <b>Lead</b>                             |     |                        |               |                       |               |
| Per doubling of lead                    |     | 1.03                   | (0.03, 2.04)  | 1.11                  | (0.05, 2.18)  |
| Lead Quartile ( $\mu\text{g/dL}$ )      |     |                        |               |                       |               |
| Q 1 (0.260-0.975)                       | 213 | 0 (Reference)          |               | 0 (Reference)         |               |
| Q 2 (0.978-1.260)                       | 213 | 1.32                   | (-0.15, 2.79) | 1.27                  | (-0.21, 2.75) |
| Q 3 (1.261-1.557)                       | 213 | 1.49                   | (0.03, 2.94)  | 1.40                  | (-0.05, 2.86) |
| Q 4 (1.562-5.904)                       | 214 | 1.65                   | (0.20, 3.10)  | 1.52                  | (0.04, 2.99)  |
| <i>P</i> -Trend                         |     | 0.030                  |               | 0.043                 |               |
| <b>Mercury</b>                          |     |                        |               |                       |               |
| Per doubling of mercury                 |     | -0.35                  | (-1.17, 0.47) | -0.41                 | (-1.23, 0.42) |
| Mercury Quartile ( $\mu\text{g/L}$ )    |     |                        |               |                       |               |
| Q 1 (0.555-1.488)                       | 213 | 0 (Reference)          |               | 0 (Reference)         |               |
| Q 2 (1.490-1.956)                       | 213 | -0.16                  | (-1.79, 1.46) | -0.30                 | (-1.92, 1.32) |
| Q 3 (1.960-2.683)                       | 214 | -1.38                  | (-2.84, 0.08) | -1.41                 | (-2.86, 0.03) |
| Q 4 (2.687-8.409)                       | 213 | 0.07                   | (-1.65, 1.79) | -0.08                 | (-1.82, 1.66) |
| <i>P</i> -Trend                         |     | 0.770                  |               | 0.679                 |               |
| <b>Cadmium</b>                          |     |                        |               |                       |               |
| Per doubling of cadmium                 |     | -0.04                  | (-0.84, 0.76) | -0.17                 | (-1.01, 0.66) |
| Cadmium Quartile ( $\mu\text{g/L}$ )    |     |                        |               |                       |               |
| Q 1 (0.010-0.245)                       | 214 | 0 (Reference)          |               | 0 (Reference)         |               |
| Q 2 (0.246-0.341)                       | 213 | 0.43                   | (-1.24, 2.11) | 0.39                  | (-1.23, 2.00) |
| Q 3 (0.342-0.495)                       | 213 | 0.66                   | (-1.01, 2.32) | 0.55                  | (-1.08, 2.19) |
| Q 4 (0.496-2.067)                       | 213 | 0.62                   | (-1.15, 2.38) | 0.45                  | (-1.25, 2.15) |
| <i>P</i> -Trend                         |     | 0.478                  |               | 0.670                 |               |

Models were adjusted for age, age<sup>2</sup>, sex, education, BMI, cigarette smoke, recreational noise, and firearm noise. For the multi-pollutant models, effect estimates for each metal were computed while the other two metal variables were included as covariates.

PTA, Pure tone average

<sup>a</sup>Speech-frequency PTA at 0.5, 1, 2, and 4 kHz.

<sup>b</sup>High-frequency PTA at 3, 4, and 6 kHz.

**Table S5.** ORs (95% CIs) of hearing loss (>25dB) by blood lead, mercury, and cadmium levels stratified by adult age groups at single-pollutant models in adults (n=5,187)

| Age strata                              | 20-39 years (n=2,031) | 40-59 years (n=2,101) | 60-87 years (n=1,055) | <i>p</i> for interaction by age strata |
|-----------------------------------------|-----------------------|-----------------------|-----------------------|----------------------------------------|
| <b>Speech-frequency PTA<sup>a</sup></b> |                       |                       |                       |                                        |
| <b>Lead</b>                             |                       |                       |                       |                                        |
| Per doubling of lead                    | 0.78 (0.41, 1.48)     | 1.33 (1.05, 1.70)     | 1.06 (0.72, 1.57)     | <i>0.475</i>                           |
| Lead Quartile ( $\mu\text{g/dL}$ )      |                       |                       |                       |                                        |
| Q 1 (0.327-1.593)                       | 1 (Reference)         | 1 (Reference)         | 1 (Reference)         |                                        |
| Q 2 (1.594-2.146)                       | 0.45 (0.23, 0.88)     | 0.97 (0.59, 1.59)     | 1.32 (0.64, 2.74)     |                                        |
| Q 3 (2.148-2.822)                       | 0.67 (0.33, 1.39)     | 1.45 (0.91, 2.30)     | 1.65 (0.89, 3.05)     |                                        |
| Q 4 (2.823-26.507)                      | 0.90 (0.34, 2.39)     | 1.33 (0.85, 2.06)     | 1.46 (0.74, 2.88)     |                                        |
| <i>P</i> -Trend                         | <i>0.819</i>          | <i>0.069</i>          | <i>0.235</i>          | <i>0.303</i>                           |
| <b>Mercury</b>                          |                       |                       |                       |                                        |
| Per doubling of mercury                 | 0.91 (0.59, 1.39)     | 0.98 (0.83, 1.15)     | 0.92 (0.75, 1.14)     | <i>0.865</i>                           |
| Mercury Quartile ( $\mu\text{g/L}$ )    |                       |                       |                       |                                        |
| Q 1 (0.363-2.378)                       | 1 (Reference)         | 1 (Reference)         | 1 (Reference)         |                                        |
| Q 2 (2.379-3.528)                       | 0.55 (0.29, 1.05)     | 0.96 (0.61, 1.49)     | 0.79 (0.45, 1.41)     |                                        |
| Q 3 (3.529-5.369)                       | 0.65 (0.30, 1.40)     | 0.90 (0.60, 1.34)     | 0.71 (0.40, 1.27)     |                                        |
| Q 4 (5.370-60.678)                      | 0.84 (0.35, 2.03)     | 0.87 (0.58, 1.32)     | 0.76 (0.45, 1.28)     |                                        |
| <i>P</i> -Trend                         | <i>0.697</i>          | <i>0.483</i>          | <i>0.263</i>          | <i>0.910</i>                           |
| <b>Cadmium</b>                          |                       |                       |                       |                                        |
| Per doubling of cadmium                 | 1.09 (0.74, 1.62)     | 1.21 (0.98, 1.49)     | 1.16 (0.85, 1.57)     | <i>0.636</i>                           |
| Mercury Quartile ( $\mu\text{g/L}$ )    |                       |                       |                       |                                        |
| Q 1 (0.068-0.689)                       | 1 (Reference)         | 1 (Reference)         | 1 (Reference)         |                                        |
| Q 2 (0.690-1.033)                       | 1.52 (0.66, 3.53)     | 1.02 (0.62, 1.66)     | 0.72 (0.37, 1.42)     |                                        |
| Q 3 (1.035-1.470)                       | 1.06 (0.37, 2.99)     | 1.30 (0.81, 2.07)     | 1.02 (0.52, 1.99)     |                                        |
| Q 4 (1.471-6.422)                       | 0.94 (0.32, 2.75)     | 1.37 (0.84, 2.24)     | 1.06 (0.53, 2.11)     |                                        |
| <i>P</i> -Trend                         | <i>0.834</i>          | <i>0.107</i>          | <i>0.403</i>          | <i>0.856</i>                           |
| <b>High-frequency PTA<sup>b</sup></b>   |                       |                       |                       |                                        |
| <b>Lead</b>                             |                       |                       |                       |                                        |
| Per doubling of lead                    | 0.96 (0.67, 1.37)     | 1.44 (1.14, 1.81)     | 1.60 (0.94, 2.70)     | <i>0.046</i>                           |
| Lead Quartile ( $\mu\text{g/dL}$ )      |                       |                       |                       |                                        |
| Q 1 (0.327-1.593)                       | 1 (Reference)         | 1 (Reference)         | 1 (Reference)         |                                        |
| Q 2 (1.594-2.146)                       | 0.72 (0.46, 1.12)     | 1.34 (0.90, 2.01)     | 1.73 (0.72, 4.13)     |                                        |
| Q 3 (2.148-2.822)                       | 0.75 (0.45, 1.25)     | 1.55 (1.07, 2.26)     | 2.97 (1.29, 6.83)     |                                        |
| Q 4 (2.823-26.507)                      | 1.21 (0.69, 2.13)     | 1.92 (1.29, 2.84)     | 2.45 (1.14, 5.23)     |                                        |
| <i>P</i> -Trend                         | <i>0.603</i>          | <i>0.001</i>          | <i>0.010</i>          | <i>0.041</i>                           |
| <b>Mercury</b>                          |                       |                       |                       |                                        |
| Per doubling of mercury                 | 0.94 (0.74, 1.20)     | 0.99 (0.87, 1.14)     | 0.99 (0.71, 1.37)     | <i>0.693</i>                           |
| Mercury Quartile ( $\mu\text{g/L}$ )    |                       |                       |                       |                                        |
| Q 1 (0.363-2.378)                       | 1 (Reference)         | 1 (Reference)         | 1 (Reference)         |                                        |
| Q 2 (2.379-3.528)                       | 0.82 (0.52, 1.31)     | 0.95 (0.65, 1.38)     | 0.68 (0.30, 1.56)     |                                        |
| Q 3 (3.529-5.369)                       | 1.02 (0.63, 1.64)     | 0.73 (0.51, 1.06)     | 1.00 (0.46, 2.18)     |                                        |
| Q 4 (5.370-60.678)                      | 0.85 (0.48, 1.50)     | 0.89 (0.62, 1.28)     | 0.97 (0.45, 2.08)     |                                        |
| <i>P</i> -Trend                         | <i>0.791</i>          | <i>0.365</i>          | <i>0.875</i>          | <i>0.763</i>                           |
| <b>Cadmium</b>                          |                       |                       |                       |                                        |
| Per doubling of cadmium                 | 1.04 (0.80, 1.35)     | 1.31 (1.08, 1.58)     | 1.52 (1.04, 2.23)     | <i>0.158</i>                           |
| Mercury Quartile ( $\mu\text{g/L}$ )    |                       |                       |                       |                                        |
| Q 1 (0.068-0.689)                       | 1 (Reference)         | 1 (Reference)         | 1 (Reference)         |                                        |
| Q 2 (0.690-1.033)                       | 1.07 (0.64, 1.80)     | 1.32 (0.90, 1.95)     | 0.50 (0.16, 1.50)     |                                        |
| Q 3 (1.035-1.470)                       | 1.30 (0.74, 2.29)     | 1.64 (1.10, 2.46)     | 1.07 (0.35, 3.23)     |                                        |
| Q 4 (1.471-6.422)                       | 0.82 (0.42, 1.60)     | 1.76 (1.14, 2.70)     | 1.36 (0.46, 3.98)     |                                        |
| <i>P</i> -Trend                         | <i>0.941</i>          | <i>0.009</i>          | <i>0.030</i>          | <i>0.117</i>                           |

Models were adjusted for age, age<sup>2</sup>, sex, education, BMI, cigarette smoke, current diagnosis of hypertension, current diagnosis of diabetes, occupational noise, recreational noise, and firearm noise.

PTA, Pure tone average.

<sup>a</sup> Speech-frequency PTA at 0.5, 1, 2, and 4 kHz.

<sup>b</sup> High-frequency PTA at 3, 4, and 6 kHz.



**Table S6.** Urinary cotinine-adjusted ORs (95% CIs) of hearing loss (>25dB) by blood cadmium levels at single-pollutant models in adults (n=3,292<sup>a</sup>)

|                                         |           | Non-adjustment<br>for cotinine <sup>b</sup> | Adjustment<br>for cotinine <sup>c</sup> |
|-----------------------------------------|-----------|---------------------------------------------|-----------------------------------------|
| <b>Speech-frequency PTA<sup>d</sup></b> |           |                                             |                                         |
| Per doubling of cadmium                 | 757/3292  | 1.22 (1.01, 1.47)                           | 1.24 (1.03, 1.51)                       |
| Cadmium Quartile ( $\mu\text{g/L}$ )    |           |                                             |                                         |
| Q 1 (0.098-0.710)                       | 99/823    | 1 (Reference)                               | 1 (Reference)                           |
| Q 2 (0.711-1.058)                       | 178/823   | 1.15 (0.75, 1.76)                           | 1.18 (0.77, 1.80)                       |
| Q 3 (1.060-1.500)                       | 218/824   | 1.26 (0.83, 1.89)                           | 1.28 (0.85, 1.94)                       |
| Q 4 (1.501-5.540)                       | 262/822   | 1.56 (1.00, 2.45)                           | 1.63 (1.02, 2.58)                       |
| P-Trend                                 |           | 0.051                                       | 0.037                                   |
| <b>High-frequency PTA<sup>e</sup></b>   |           |                                             |                                         |
| Per doubling of cadmium                 | 1406/3292 | 1.35 (1.13, 1.61)                           | 1.34 (1.11, 1.60)                       |
| Cadmium Quartile ( $\mu\text{g/L}$ )    |           |                                             |                                         |
| Q 1 (0.098-0.710)                       | 200/823   | 1 (Reference)                               | 1 (Reference)                           |
| Q 2 (0.711-1.058)                       | 335/823   | 1.36 (0.96, 1.95)                           | 1.36 (0.95, 1.94)                       |
| Q 3 (1.060-1.500)                       | 414/824   | 1.54 (1.08, 2.22)                           | 1.53 (1.06, 2.20)                       |
| Q 4 (1.501-5.540)                       | 457/822   | 1.86 (1.25, 2.77)                           | 1.82 (1.21, 2.75)                       |
| P-Trend                                 |           | 0.002                                       | 0.004                                   |

<sup>a</sup>Data for these analyses (n=3,292) used KNHANES 2010-2011 because urinary cotinine levels were not available in KNHANES 2012.

<sup>b</sup>Adjusted for age, age<sup>2</sup>, sex, education, BMI, cigarette smoke, current diagnosis of hypertension, current diagnosis of diabetes, occupational noise, recreational noise, and firearm noise.

<sup>c</sup>Further adjusted for urinary cotinine (creatinine-corrected).

PTA, Pure tone average

<sup>d</sup>Speech-frequency PTA at 0.5, 1, 2, and 4 kHz.

<sup>e</sup>Speech-frequency PTA at 3, 4, and 6 kHz.

**Table S7.** Fish intake-adjusted ORs (95% CIs) of hearing loss (>25dB) by blood mercury levels at single-pollutant models in adults (n=2,973<sup>a</sup>)

|                                         |           | Non-adjustment<br>for fish intake <sup>b</sup> | Adjustment<br>for fish intake <sup>c</sup> |
|-----------------------------------------|-----------|------------------------------------------------|--------------------------------------------|
| <b>Speech-frequency PTA<sup>d</sup></b> |           |                                                |                                            |
| Per doubling of mercury                 | 657/2973  | 0.98 (0.83, 1.15)                              | 0.98 (0.84, 1.16)                          |
| Mercury Quartile ( $\mu\text{g/L}$ )    |           |                                                |                                            |
| Q 1 (0.620-2.395)                       | 168/743   | 1 (Reference)                                  | 1 (Reference)                              |
| Q 2 (2.397-3.558)                       | 145/744   | 0.77 (0.49, 1.19)                              | 0.78 (0.50, 1.20)                          |
| Q 3 (3.560-5.414)                       | 155/743   | 0.81 (0.53, 1.24)                              | 0.83 (0.54, 1.26)                          |
| Q 4 (5.417-40.901)                      | 189/743   | 0.80 (0.54, 1.18)                              | 0.81 (0.55, 1.19)                          |
| <i>P</i> -Trend                         |           | 0.325                                          | 0.363                                      |
| <b>High-frequency PTA<sup>e</sup></b>   |           |                                                |                                            |
| Per doubling of mercury                 | 1206/2973 | 1.00 (0.86, 1.16)                              | 1.02 (0.88, 1.18)                          |
| Mercury Quartile ( $\mu\text{g/L}$ )    |           |                                                |                                            |
| Q 1 (0.620-2.395)                       | 274/743   | 1 (Reference)                                  | 1 (Reference)                              |
| Q 2 (2.397-3.558)                       | 261/744   | 0.81 (0.57, 1.15)                              | 0.84 (0.59, 1.19)                          |
| Q 3 (3.560-5.414)                       | 294/743   | 0.76 (0.54, 1.08)                              | 0.79 (0.55, 1.12)                          |
| Q 4 (5.417-40.901)                      | 377/743   | 0.89 (0.62, 1.28)                              | 0.93 (0.65, 1.34)                          |
| <i>P</i> -Trend                         |           | 0.533                                          | 0.687                                      |

<sup>a</sup>Data for these analyses (n=2,973) used subpopulation that had dietary intake information.

<sup>b</sup>Adjusted for age, age<sup>2</sup>, sex, education, BMI, cigarette smoke, current diagnosis of hypertension, current diagnosis of diabetes, occupational noise, recreational noise, and firearm noise.

<sup>c</sup>Further adjusted for daily fish intake.

PTA, Pure tone average.

<sup>d</sup>Speech-frequency PTA at 0.5, 1, 2, and 4 kHz.

<sup>e</sup>High-frequency PTA at 3, 4, and 6 kHz.

**Table S8.** Cholesterol-adjusted ORs (95% CIs) of hearing loss (>25dB) by levels of blood lead, mercury, and cadmium at single-pollutant models in adults (n=5,187)

| Variables                                   | No. hearing loss/<br>No. participants | Non-adjustment<br>for cholesterol <sup>a</sup> | Adjustment<br>for cholesterol <sup>b</sup> |
|---------------------------------------------|---------------------------------------|------------------------------------------------|--------------------------------------------|
| <b>Speech-frequency PTA<sup>c</sup></b>     |                                       |                                                |                                            |
| <b>Lead</b>                                 |                                       |                                                |                                            |
| Per doubling of lead                        | 1124/5187                             | 1.15 (0.94, 1.41)                              | 1.15 (0.94, 1.40)                          |
| Lead Quartile ( $\mu\text{g}/\text{dL}$ )   |                                       |                                                |                                            |
| Q 1 (0.327-1.593)                           | 170/1296                              | 1 (Reference)                                  | 1 (Reference)                              |
| Q 2 (1.594-2.146)                           | 204/1296                              | 0.94 (0.65, 1.35)                              | 0.93 (0.65, 1.34)                          |
| Q 3 (2.148-2.822)                           | 330/1298                              | 1.29 (0.92, 1.78)                              | 1.28 (0.92, 1.78)                          |
| Q 4 (2.823-26.507)                          | 420/1297                              | 1.25 (0.87, 1.79)                              | 1.24 (0.86, 1.78)                          |
| <i>P</i> -Trend                             |                                       | 0.066                                          | 0.071                                      |
| <b>Mercury</b>                              |                                       |                                                |                                            |
| Per doubling of mercury                     | 1124/5187                             | 0.96 (0.84, 1.08)                              | 0.95 (0.84, 1.08)                          |
| Mercury Quartile ( $\mu\text{g}/\text{L}$ ) |                                       |                                                |                                            |
| Q 1 (0.363-2.378)                           | 284/1296                              | 1 (Reference)                                  | 1 (Reference)                              |
| Q 2 (2.379-3.528)                           | 250/1297                              | 0.84 (0.61, 1.17)                              | 0.84 (0.61, 1.17)                          |
| Q 3 (3.529-5.369)                           | 267/1296                              | 0.79 (0.58, 1.09)                              | 0.79 (0.57, 1.09)                          |
| Q 4 (5.370-60.678)                          | 323/1298                              | 0.84 (0.63, 1.12)                              | 0.83 (0.62, 1.11)                          |
| <i>P</i> -Trend                             |                                       | 0.221                                          | 0.210                                      |
| <b>Cadmium</b>                              |                                       |                                                |                                            |
| Per doubling of cadmium                     | 1124/5187                             | 1.18 (1.00, 1.39)                              | 1.18 (0.99, 1.39)                          |
| Cadmium Quartile ( $\mu\text{g}/\text{L}$ ) |                                       |                                                |                                            |
| Q 1 (0.068-0.689)                           | 140/1293                              | 1 (Reference)                                  | 1 (Reference)                              |
| Q 2 (0.690-1.033)                           | 255/1300                              | 1.04 (0.73, 1.49)                              | 1.04 (0.73, 1.49)                          |
| Q 3 (1.035-1.470)                           | 340/1299                              | 1.22 (0.86, 1.72)                              | 1.22 (0.86, 1.72)                          |
| Q 4 (1.471-6.422)                           | 389/1295                              | 1.30 (0.88, 1.91)                              | 1.29 (0.88, 1.91)                          |
| <i>P</i> -Trend                             |                                       | 0.117                                          | 0.120                                      |
| <b>High-frequency PTA<sup>d</sup></b>       |                                       |                                                |                                            |
| <b>Lead</b>                                 |                                       |                                                |                                            |
| Per doubling of lead                        | 1124/5187                             | 1.30 (1.08, 1.57)                              | 1.30 (1.08, 1.56)                          |
| Lead Quartile ( $\mu\text{g}/\text{dL}$ )   |                                       |                                                |                                            |
| Q 1 (0.327-1.593)                           | 276/1296                              | 1 (Reference)                                  | 1 (Reference)                              |
| Q 2 (1.594-2.146)                           | 420/1296                              | 1.13 (0.83, 1.53)                              | 1.13 (0.83, 1.53)                          |
| Q 3 (2.148-2.822)                           | 587/1298                              | 1.35 (1.00, 1.81)                              | 1.34 (1.00, 1.80)                          |
| Q 4 (2.823-26.507)                          | 810/1297                              | 1.70 (1.25, 2.31)                              | 1.69 (1.24, 2.30)                          |
| <i>P</i> -Trend                             |                                       | <0.001                                         | <0.001                                     |
| <b>Mercury</b>                              |                                       |                                                |                                            |
| Per doubling of mercury                     | 1124/5187                             | 0.98 (0.87, 1.09)                              | 0.97 (0.87, 1.09)                          |
| Mercury Quartile ( $\mu\text{g}/\text{L}$ ) |                                       |                                                |                                            |
| Q 1 (0.363-2.378)                           | 469/1296                              | 1 (Reference)                                  | 1 (Reference)                              |
| Q 2 (2.379-3.528)                           | 460/1297                              | 0.89 (0.68, 1.16)                              | 0.89 (0.68, 1.16)                          |
| Q 3 (3.529-5.369)                           | 524/1296                              | 0.83 (0.63, 1.08)                              | 0.82 (0.63, 1.08)                          |
| Q 4 (5.370-60.678)                          | 640/1298                              | 0.89 (0.68, 1.17)                              | 0.89 (0.68, 1.16)                          |
| <i>P</i> -Trend                             |                                       | 0.382                                          | 0.347                                      |
| <b>Cadmium</b>                              |                                       |                                                |                                            |
| Per doubling of cadmium                     | 1124/5187                             | 1.25 (1.08, 1.44)                              | 1.25 (1.08, 1.44)                          |
| Cadmium Quartile ( $\mu\text{g}/\text{L}$ ) |                                       |                                                |                                            |
| Q 1 (0.068-0.689)                           | 289/1293                              | 1 (Reference)                                  | 1 (Reference)                              |
| Q 2 (0.690-1.033)                           | 489/1300                              | 1.10 (0.81, 1.49)                              | 1.10 (0.81, 1.49)                          |
| Q 3 (1.035-1.470)                           | 645/1299                              | 1.43 (1.06, 1.93)                              | 1.43 (1.06, 1.93)                          |
| Q 4 (1.471-6.422)                           | 670/1295                              | 1.47 (1.05, 2.05)                              | 1.47 (1.05, 2.05)                          |
| <i>P</i> -Trend                             |                                       | 0.007                                          | 0.007                                      |

<sup>a</sup> Adjusted for age, age<sup>2</sup>, sex, education, BMI, cigarette smoke, current diagnosis of hypertension, current diagnosis of diabetes, occupational noise, recreational noise, and firearm noise.

<sup>b</sup> Further adjusted for cholesterol.

<sup>c</sup> Speech-frequency PTA at 0.5, 1, 2, and 4 kHz.

<sup>d</sup> High-frequency PTA at 3, 4, and 6 kHz.

**Table S9.** Education-unadjusted ORs (95% CIs) of hearing loss (>25dB) by levels of blood lead, mercury, and cadmium at single-pollutant models in adults (n=5,187)

| Variables                               | No. hearing loss/<br>No. participants | Adjustment<br>for education <sup>a</sup> | Non-adjustment<br>for education <sup>b</sup> |
|-----------------------------------------|---------------------------------------|------------------------------------------|----------------------------------------------|
| <b>Speech-frequency PTA<sup>c</sup></b> |                                       |                                          |                                              |
| <b>Lead</b>                             |                                       |                                          |                                              |
| Per doubling of lead                    | 1124/5187                             | 1.15 (0.94, 1.41)                        | 1.18 (0.96, 1.44)                            |
| Lead Quartile ( $\mu\text{g/dL}$ )      |                                       |                                          |                                              |
| Q 1 (0.327-1.593)                       | 170/1296                              | 1 (Reference)                            | 1 (Reference)                                |
| Q 2 (1.594-2.146)                       | 204/1296                              | 0.94 (0.65, 1.35)                        | 0.95 (0.66, 1.37)                            |
| Q 3 (2.148-2.822)                       | 330/1298                              | 1.29 (0.92, 1.78)                        | 1.31 (0.94, 1.83)                            |
| Q 4 (2.823-26.507)                      | 420/1297                              | 1.25 (0.87, 1.79)                        | 1.29 (0.90, 1.86)                            |
| <i>P</i> -Trend                         |                                       | 0.066                                    | 0.040                                        |
| <b>Mercury</b>                          |                                       |                                          |                                              |
| Per doubling of mercury                 | 1124/5187                             | 0.96 (0.84, 1.08)                        | 0.95 (0.84, 1.07)                            |
| Mercury Quartile ( $\mu\text{g/L}$ )    |                                       |                                          |                                              |
| Q 1 (0.363-2.378)                       | 284/1296                              | 1 (Reference)                            | 1 (Reference)                                |
| Q 2 (2.379-3.528)                       | 250/1297                              | 0.84 (0.61, 1.17)                        | 0.83 (0.60, 1.15)                            |
| Q 3 (3.529-5.369)                       | 267/1296                              | 0.79 (0.58, 1.09)                        | 0.79 (0.60, 1.08)                            |
| Q 4 (5.370-60.678)                      | 323/1298                              | 0.84 (0.63, 1.12)                        | 0.82 (0.61, 1.09)                            |
| <i>P</i> -Trend                         |                                       | 0.221                                    | 0.168                                        |
| <b>Cadmium</b>                          |                                       |                                          |                                              |
| Per doubling of cadmium                 | 1124/5187                             | 1.18 (1.00, 1.39)                        | 1.19 (1.01, 1.41)                            |
| Cadmium Quartile ( $\mu\text{g/L}$ )    |                                       |                                          |                                              |
| Q 1 (0.068-0.689)                       | 140/1293                              | 1 (Reference)                            | 1 (Reference)                                |
| Q 2 (0.690-1.033)                       | 255/1300                              | 1.04 (0.73, 1.49)                        | 1.03 (0.72, 1.48)                            |
| Q 3 (1.035-1.470)                       | 340/1299                              | 1.22 (0.86, 1.72)                        | 1.22 (0.87, 1.72)                            |
| Q 4 (1.471-6.422)                       | 389/1295                              | 1.30 (0.88, 1.91)                        | 1.33 (0.90, 1.96)                            |
| <i>P</i> -Trend                         |                                       | 0.117                                    | 0.080                                        |
| <b>High-frequency PTA<sup>d</sup></b>   |                                       |                                          |                                              |
| <b>Lead</b>                             |                                       |                                          |                                              |
| Per doubling of lead                    | 1124/5187                             | 1.30 (1.08, 1.57)                        | 1.35 (1.12, 1.62)                            |
| Lead Quartile ( $\mu\text{g/dL}$ )      |                                       |                                          |                                              |
| Q 1 (0.327-1.593)                       | 276/1296                              | 1 (Reference)                            | 1 (Reference)                                |
| Q 2 (1.594-2.146)                       | 420/1296                              | 1.13 (0.83, 1.53)                        | 1.15 (0.85, 1.57)                            |
| Q 3 (2.148-2.822)                       | 587/1298                              | 1.35 (1.00, 1.81)                        | 1.38 (1.03, 1.85)                            |
| Q 4 (2.823-26.507)                      | 810/1297                              | 1.70 (1.25, 2.31)                        | 1.78 (1.31, 2.42)                            |
| <i>P</i> -Trend                         |                                       | <0.001                                   | <0.001                                       |
| <b>Mercury</b>                          |                                       |                                          |                                              |
| Per doubling of mercury                 | 1124/5187                             | 0.98 (0.87, 1.09)                        | 0.97 (0.87, 1.08)                            |
| Mercury Quartile ( $\mu\text{g/L}$ )    |                                       |                                          |                                              |
| Q 1 (0.363-2.378)                       | 469/1296                              | 1 (Reference)                            | 1 (Reference)                                |
| Q 2 (2.379-3.528)                       | 460/1297                              | 0.89 (0.68, 1.16)                        | 0.88 (0.68, 1.15)                            |
| Q 3 (3.529-5.369)                       | 524/1296                              | 0.83 (0.63, 1.08)                        | 0.83 (0.63, 1.08)                            |
| Q 4 (5.370-60.678)                      | 640/1298                              | 0.89 (0.68, 1.17)                        | 0.87 (0.66, 1.13)                            |
| <i>P</i> -Trend                         |                                       | 0.382                                    | 0.273                                        |
| <b>Cadmium</b>                          |                                       |                                          |                                              |
| Per doubling of cadmium                 | 1124/5187                             | 1.25 (1.08, 1.44)                        | 1.28 (1.11, 1.48)                            |
| Cadmium Quartile ( $\mu\text{g/L}$ )    |                                       |                                          |                                              |
| Q 1 (0.068-0.689)                       | 289/1293                              | 1 (Reference)                            | 1 (Reference)                                |
| Q 2 (0.690-1.033)                       | 489/1300                              | 1.10 (0.81, 1.49)                        | 1.11 (0.82, 1.51)                            |
| Q 3 (1.035-1.470)                       | 645/1299                              | 1.43 (1.06, 1.93)                        | 1.46 (1.09, 1.97)                            |
| Q 4 (1.471-6.422)                       | 670/1295                              | 1.47 (1.05, 2.05)                        | 1.55 (1.12, 2.16)                            |
| <i>P</i> -Trend                         |                                       | 0.007                                    | 0.002                                        |

<sup>a</sup> Adjusted for age, age<sup>2</sup>, sex, education, BMI, cigarette smoke, current diagnosis of hypertension, current diagnosis of diabetes, occupational noise, recreational noise, and firearm noise.

<sup>b</sup> Subtracting adjustment for education.

<sup>c</sup> Speech-frequency PTA at 0.5, 1, 2, and 4 kHz.

<sup>d</sup> High-frequency PTA at 3, 4, and 6 kHz.
